# Supplementary material for: Ecological Integrity Impairment and Habitat Fragmentation for Neotropical Macroinvertebrate Communities in an Agricultural Stream
Source: MDPI journal article supplement (doi:10.3390/toxics10070346), 2022-06-22
Supplement: s1 [file s1]

# Supplementary Materials: Ecological Integrity Impairment and Habitat Fragmentation for Neotropical Macroinvertebrate Communities in an Agricultural Stream

Silvia Echeverría-Sáenz, Rocío Ugalde-Salazar, Meyer Guevara-Mora, Francisco Quesada-Alvarado and Clemens Ruepert

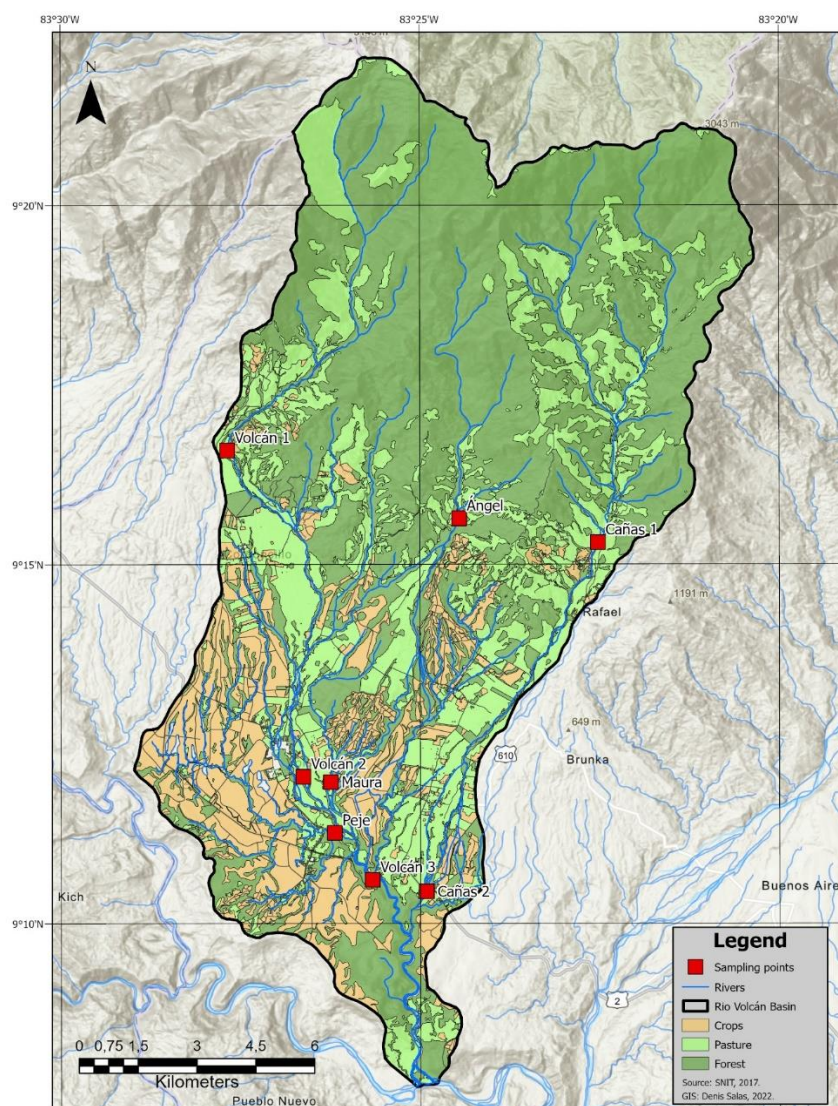

**Figure S1.** Map of the Volcán River watershed (South Pacific, Costa Rica) and sampling sites.

**Table S1.** Pesticide residue limits of detection (LOD) and of quantification (LOQ) in both study periods (2011–2013 and 2018–2019) in µg/L. Active ingredients are ordered alphabetically.

| Active ingredient. | Volcán (2011–2013) |      | Q_Peje (2018–2019) |      |
|--------------------|--------------------|------|--------------------|------|
|                    | LOD                | LOQ  | LOD                | LOQ  |
| a-cypermethrin     | 0.03               | 0.1  | 0.02               | 0.05 |
| ametryn            | 0.02               | 0.05 | 0.01               | 0.03 |

| Active ingredient.     | Volcán (2011-2013) |      | Q_Peje (2018-2019) |      |
|------------------------|--------------------|------|--------------------|------|
|                        | LOD                | LOQ  | LOD                | LOQ  |
| atrazine               | 0.02               | 0.05 | 0.02               | 0.05 |
| azoxystrobin           |                    |      | 0.02               | 0.05 |
| bentazone              |                    |      | 0.02               | 0.05 |
| bifenthrin             | 0.1                | 0.5  | 0.02               | 0.05 |
| bitertanol             | 0.06               | 0.2  | 0.02               | 0.05 |
| boscalid               |                    |      | 0.02               | 0.05 |
| bromacil               | 0.03               | 0.1  | 0.02               | 0.05 |
| buprofezin             |                    |      | 0.02               | 0.05 |
| butachlor              | 0.2                | 0.6  | 0.02               | 0.05 |
| cadusafos              |                    |      | 0.02               | 0.05 |
| carbaryl               | 0.06               | 0.2  | 0.02               | 0.05 |
| carbendazim            |                    |      | 0.02               | 0.05 |
| carbofuran             |                    |      | 0.02               | 0.05 |
| cyhalothrin            | 0.04               | 0.1  | 0.02               | 0.05 |
| cyproconazole          |                    |      | 0.02               | 0.05 |
| clomazone              |                    |      | 0.02               | 0.05 |
| chlorothalonil         | 0.03               | 0.1  | 0.01               | 0.02 |
| chlorpyrifos           | 0.02               | 0.05 | 0.01               | 0.02 |
| DDD-pp(M)              |                    |      | 0.02               | 0.05 |
| DDE-pp(M)              |                    |      | 0.02               | 0.05 |
| deltamethrin           | 0.06               | 0.2  | 0.02               | 0.05 |
| diazinon               | 0.01               | 0.02 | 0.01               | 0.03 |
| difenoconazole         |                    |      | 0.02               | 0.05 |
| dimethoate             | 0.04               | 0.1  | 0.02               | 0.05 |
| diuron                 | 0.03               | 0.1  | 0.02               | 0.05 |
| endosulfan-a           | 0.04               | 0.1  | 0.02               | 0.05 |
| endosulfan-b           | 0.04               | 0.1  | 0.02               | 0.05 |
| endosulfan sulfate (M) |                    |      | 0.02               | 0.05 |
| epoxiconazole          | 0.06               | 0.2  | 0.02               | 0.05 |
| ethoprophos            | 0.04               | 0.1  | 0.01               | 0.04 |
| fenamiphos             | 0.3                | 1    | 0.02               | 0.05 |
| fenbuconazole          |                    |      | 0.02               | 0.05 |
| fenpropimorph          |                    |      | 0.02               | 0.05 |
| fenthion               | 0.04               | 0.1  | 0.02               | 0.05 |
| fluopyram              |                    |      | 0.02               | 0.05 |
| flutolanil             |                    |      | 0.02               | 0.05 |
| phorate                | 0.04               | 0.1  | 0.02               | 0.05 |
| hexachlorobenzene      |                    |      | 0.02               | 0.05 |
| hexazinone             | 0.05               | 0.1  | 0.02               | 0.05 |
| imidacloprid           |                    |      | 0.02               | 0.05 |
| lindane                |                    |      | 0.02               | 0.05 |
| linuron                |                    |      | 0.02               | 0.05 |
| malathion              | 0.03               | 0.1  | 0.02               | 0.05 |
| metalaxyl              | 0.1                | 0.2  | 0.02               | 0.05 |
| myclobutanil           |                    |      | 0.02               | 0.05 |
| oxifluorfen            | 0.06               | 0.2  | 0.02               | 0.05 |
| parathion-methyl       | 0.06               | 0.2  | 0.02               | 0.05 |
| pendimethalin          | 0.03               | 0.1  | 0.02               | 0.05 |
| pentachloroaniline (M) |                    |      | 0.02               | 0.05 |
| pentachloroanisole (M) |                    |      | 0.02               | 0.05 |
| entachlorobenzene (M)  |                    |      | 0.02               | 0.05 |
| permethrin             | 0.03               | 0.1  | 0.02               | 0.05 |
| pyrimethanil           |                    |      | 0.02               | 0.05 |
| prochloraz             | 0.3                | 1    |                    |      |
| propanil               | 0.2                | 0.6  | 0.03               | 0.1  |
| propiconazole          | 0.05               | 0.2  | 0.02               | 0.05 |

| Active ingredient. | Volcán (2011-2013) |      | Q_Peje (2018-2019) |      |
|--------------------|--------------------|------|--------------------|------|
|                    | LOD                | LOQ  | LOD                | LOQ  |
| quintozene (PCNB)  |                    |      | 0.02               | 0.05 |
| spiroxamine        |                    |      | 0.02               | 0.05 |
| tebuconazole       | 0.05               | 0.2  | 0.02               | 0.05 |
| terbufos           | 0.03               | 0.1  | 0.02               | 0.05 |
| terbuthylazine     | 0.03               | 0.05 | 0.02               | 0.05 |
| terbutryn          | 0.03               | 0.1  | 0.02               | 0.05 |
| thiabendazole      |                    |      | 0.02               | 0.05 |
| triadimefon        | 0.3                | 1    | 0.02               | 0.05 |
| triadimenol        | 0.3                | 1    | 0.02               | 0.05 |
| triazophos         |                    |      | 0.02               | 0.05 |
| trifloxystrobin    |                    |      | 0.02               | 0.05 |

**Table S2.** Pesticide active ingredient Mode of Action according to Fungicides, Herbicides and Insecticides Resistance Action Committees FRAC/ IRAC/ HRAC [45,46,47].

| Active ingredient | CAS number | Biocide action          | FRAC/HRAC/                            |               | MoA Description                                   |
|-------------------|------------|-------------------------|---------------------------------------|---------------|---------------------------------------------------|
|                   |            |                         | Chemical group                        | IRAC MoA code |                                                   |
| metalaxyl         | 57837-19-1 | fungicide               | acylalanine                           | FA1           | protein synthesis inhibitor                       |
| propiconazole     | 60207-90-1 | fungicide               | triazole                              | FG1           | demethylation in sterol biosynthesis inhibitor    |
| oxyfluorfen       | 42874-03-3 | herbicide               | diphenylether, chlorinated, fluorated | H14           | Protoporphyrinogen Oxidase inhibitor              |
| ametryn           | 834-12-8   | herbicide               | triazine                              | H5            | photosystem II inhibitor (D1 Serine 264 Binders)  |
| bromacil          | 314-40-9   | herbicide               | uracil, bromated                      | H5            | photosystem II inhibitor (D1 Serine 264 Binders)  |
| diuron            | 330-54-1   | herbicide               | urea, chlorinated                     | H5            | photosystem II inhibitor (D1 Serine 264 Binders)  |
| hexazinone        | 51235-04-2 | herbicide               | triazinone                            | H5            | photosystem II inhibitor (D1 Serine 264 Binders)  |
| terbutryn         | 886-50-0   | herbicide               | triazine                              | H5            | photosystem II inhibitor (D1 Serine 264 Binders)  |
| carbaryl          | 63-25-2    | insecticide             | carbamate                             | I1A           | Acetylcholinesterase inhibitor                    |
| permethrin        | 52645-53-1 | insecticide             | pyrethroid, chlorinated               | I3A           | Sodium channel modulator (blocks nervous stimuli) |
| carbofuran        | 1563-66-2  | insecticide, nematicide | carbamate                             | I1A           | Acetylcholinesterase inhibitor                    |
| cadusafos         | 95465-99-9 | insecticide, nematicide | organophosphate                       | I1B           | Acetylcholinesterase inhibitor                    |
| diazinon          | 333-41-5   | insecticide, nematicide | organophosphate                       | I1B           | Acetylcholinesterase inhibitor                    |
| ethoprophos       | 13194-48-4 | insecticide, nematicide | organophosphate                       | I1B           | Acetylcholinesterase inhibitor                    |

**Table S3.** Maximum detected concentration and EQS\* ( $\mu\text{g/L}$ ) of pesticide active ingredients in the Volcán River watershed, 2011-2013 (all sites) and 2018-2019 (only Peje stream). nd = below detection limit. na = not analyzed.

| Active ingredient | Volcán 1 | Volcán 2 | Volcan 3 | Angel | Cañas 1 | Cañas 2 | Maura | Peje  | EQS*  |
|-------------------|----------|----------|----------|-------|---------|---------|-------|-------|-------|
| diazinon          | nd       | 0.01     | 0.15     | nd    | nd      | 0.01    | 0.01  | 0.35  | 0.037 |
| ethoprophos       | nd       | nd       | nd       | nd    | nd      | nd      | nd    | 0.36  | 0.063 |
| cadusafos         | na       | nd       | nd       | na    | na      | na      | na    | 0.025 | 0.023 |

|               |    |      |       |      |      |    |      |       |        |
|---------------|----|------|-------|------|------|----|------|-------|--------|
| carbaryl      | na | nd   | 0.025 | na   | na   | na | na   | 0.13  | 0.23   |
| carbofuran    | nd | nd   | 0.025 | nd   | nd   | nd | nd   | 0.2   | 0.91   |
| permethrin    | nd | 0.02 | nd    | 0.4  | nd   | nd | nd   | nd    | 0.0003 |
| chlorpyrifos  | nd | nd   | 0.08  | nd   | nd   | nd | nd   | nd    | 0.03   |
| ametryn       | nd | nd   | nd    | nd   | nd   | nd | nd   | 0.39  | 0.01   |
| hexazinone    | nd | nd   | 0.025 | nd   | 0.3  | nd | nd   | 0.26  | 0.56   |
| oxifluorfen   | nd | nd   | nd    | nd   | nd   | nd | nd   | 0.15  | -      |
| bromacil      | nd | 0.14 | 1.3   | nd   | nd   | nd | 1.2  | 6.9   | 0.0068 |
| diuron        | nd | nd   | 0.35  | nd   | nd   | nd | nd   | 3.63  | 0.2    |
| terbutryn     | nd | nd   | 0.05  | 0.05 | 0.05 | nd | 0.05 | nd    | 0.065  |
| propiconazole | nd | nd   | nd    | nd   | nd   | nd | nd   | 0.165 | 10     |
| metalaxil     | nd | nd   | 0.025 | nd   | nd   | nd | nd   | 0.36  | 46     |

\* EQS refers to AA or MAC Environmental Quality Standards of the European Union (or the MTR eco, when the EQS is not available) [69].

**Table S4.** Macroinvertebrate families identified in each sampling campaign in the Peje stream (2011–2013 & 2018–2019). Yellow =dry season; Green= Transition; Blue = rainy season.

| 2011-2013       | dec-2011 | mar-12 | jul-12 | sep-12 | mar-13 |
|-----------------|----------|--------|--------|--------|--------|
| Ampullaridae    |          |        |        |        | X      |
| Baetidae        |          | X      | X      |        | X      |
| Bulinidae       |          | X      |        |        |        |
| Caenidae        |          | X      |        |        |        |
| Calopterygidae  |          |        |        |        | X      |
| Ceratopogonidae |          | X      |        |        | X      |
| Chironomidae    | X        | X      | X      | X      | X      |
| Coenagrionidae  |          | X      |        |        | X      |
| Corydalidae     | X        |        |        |        | X      |
| Crambidae       |          | X      |        |        |        |
| Elmidae         | X        | X      | X      | X      | X      |
| Empididae       | X        | X      | X      |        | X      |
| Glossosomatidae |          | X      |        |        |        |
| Gomphidae       |          |        | X      |        |        |
| Hydropsychidae  | X        | X      | X      | X      | X      |
| Hydroptilidae   |          | X      |        | X      | X      |
| Leptoceridae    |          |        | X      |        |        |
| Leptohyphidae   |          | X      |        |        | X      |
| Leptophlebiidae |          | X      |        |        | X      |
| Libellulidae    |          | X      |        |        |        |
| Oligochaeta     | X        | X      |        | X      |        |
| Perlidae        |          |        |        |        | X      |
| Philopotamidae  |          | X      |        |        | X      |
| Psychodidae     |          | X      | X      |        | X      |
| Ptilodactylidae | X        |        |        |        |        |
| Simuliidae      |          | X      | X      |        | X      |
| Staphylinidae   |          | X      |        |        |        |
| Tipulidae       |          | X      |        |        |        |
| Trombidiformes  |          |        | X      |        | X      |
| Turbellaria     |          | X      |        |        |        |
| Veliidae        |          | X      |        |        | X      |

Note: No sample is available for December 2012.

**Table S4 Cont.:** Macroinvertebrate families identified in each sampling campaign in the Peje stream (2011–2013 and 2018–2019). Yellow = dry season; green = transition; blue = rainy season.

| 2018-2019     | 19_mar_2018 | 18_apr_2018 | 22_may_2018 | 26_jun_2018 | 17_jul_2018 | 13_aug_2018 | 12_sep_2018 | 10_oct_2018 | 14_nov_2018 | 03_dec_2018 | 14_jan_2019 | 21_feb_2019 |
|---------------|-------------|-------------|-------------|-------------|-------------|-------------|-------------|-------------|-------------|-------------|-------------|-------------|
| adult_Diptera | X           |             |             |             |             |             |             |             |             |             |             |             |
| Baetidae      | X           |             |             | X           | X           |             |             |             |             |             | X           | X           |

| 2018-2019         | 19_mar_2018 | 18_apr_2018 | 22_may_2018 | 26_jun_2018 | 17_jul_2018 | 13_aug_2018 | 12_sep_2018 | 10_oct_2018 | 14_nov_2018 | 03_dec_2018 | 14_jan_2019 | 21_feb_2019 |
|-------------------|-------------|-------------|-------------|-------------|-------------|-------------|-------------|-------------|-------------|-------------|-------------|-------------|
| Caenidae          | X           | X           |             |             |             |             |             |             |             |             | X           |             |
| Calopterygidae    |             | X           |             |             |             |             |             |             |             |             | X           | X           |
| Ceratopogonidae   |             |             |             |             |             |             |             |             |             |             | X           |             |
| Chironomidae      | X           | X           | X           |             | X           | X           | X           | X           |             | X           | X           | X           |
| Coenagrionidae    | X           |             |             |             |             |             |             |             | X           |             |             | X           |
| Corydalidae       | X           |             |             | X           |             |             |             |             |             |             |             |             |
| Crambidae         |             |             |             |             | X           |             | X           |             |             | X           |             |             |
| Culicidae         |             |             |             |             |             |             |             |             |             |             | X           |             |
| Curculionidae     |             |             |             |             |             |             |             |             |             | X           |             |             |
| Dryopidae         |             |             |             |             |             |             |             |             |             |             | X           |             |
| Elmidae           | X           | X           | X           |             | X           | X           |             |             |             |             | X           |             |
| Empididae         |             |             |             |             |             |             |             |             |             | X           | X           |             |
| Gerridae          | X           | X           | X           |             | X           | X           |             |             |             |             | X           | X           |
| Hydropsychidae    | X           | X           | X           | X           | X           | X           | X           | X           | X           | X           | X           | X           |
| Hydroptilidae     | X           | X           |             |             |             | X           |             | X           | X           | X           |             | X           |
| Hydroscaphidae    |             |             |             |             |             |             |             |             |             |             |             | X           |
| Leptohyphidae     | X           | X           |             |             |             |             |             |             |             |             | X           | X           |
| Leptophlebiidae   | X           | X           |             |             |             |             |             |             |             |             | X           | X           |
| Libellulidae      | X           | X           |             | X           |             |             |             |             | X           |             | X           | X           |
| Ochteridae        | X           |             |             |             |             |             |             |             |             |             |             |             |
| Oligochaeta       | X           | X           |             |             |             |             |             |             |             |             |             | X           |
| Ostracoda         | X           | X           |             |             |             |             |             |             |             |             |             |             |
| Philopotamidae    |             | X           |             |             |             |             |             |             |             |             | X           | X           |
| Platystictidae    |             |             |             |             |             |             |             |             |             |             |             | X           |
| pupae_Diptera     | X           | X           | X           |             |             | X           |             |             |             |             | X           | X           |
| Simuliidae        |             | X           | X           | X           | X           |             |             |             |             |             | X           | X           |
| Staphylinidae     |             |             |             |             |             |             |             |             |             |             |             | X           |
| Tabanidae         |             |             |             |             |             |             |             |             |             |             | X           | X           |
| Tipulidae         |             |             |             |             |             |             |             |             |             |             |             | X           |
| adult_Trichoptera |             |             |             |             |             | X           |             |             |             |             |             |             |
| Veliidae          | X           | X           |             |             |             |             |             |             |             |             | X           | X           |

Note: Lower precipitations occur in July, because of a weather condition called the “veranillo”.
